# Supplementary material for: Rhodopsin and melanopsin coexist in mammalian sperm cells and activate different signaling pathways for thermotaxis
Source: PubMed Central journal article supplement (PMC6954197; doi:10.1038/s41598-019-56846-5), 2020-01-10
Supplement: 41598_2019_56846_MOESM1_ESM.pdf [file 41598_2019_56846_MOESM1_ESM.pdf]

# **Rhodopsin and melanopsin coexist in mammalian sperm cells and activate different signaling pathways for thermotaxis**

Debarun Roy, Kohava Levi, Vladimir Kiss, Reinat Nevo and Michael Eisenbach

## **Supplementary Information**

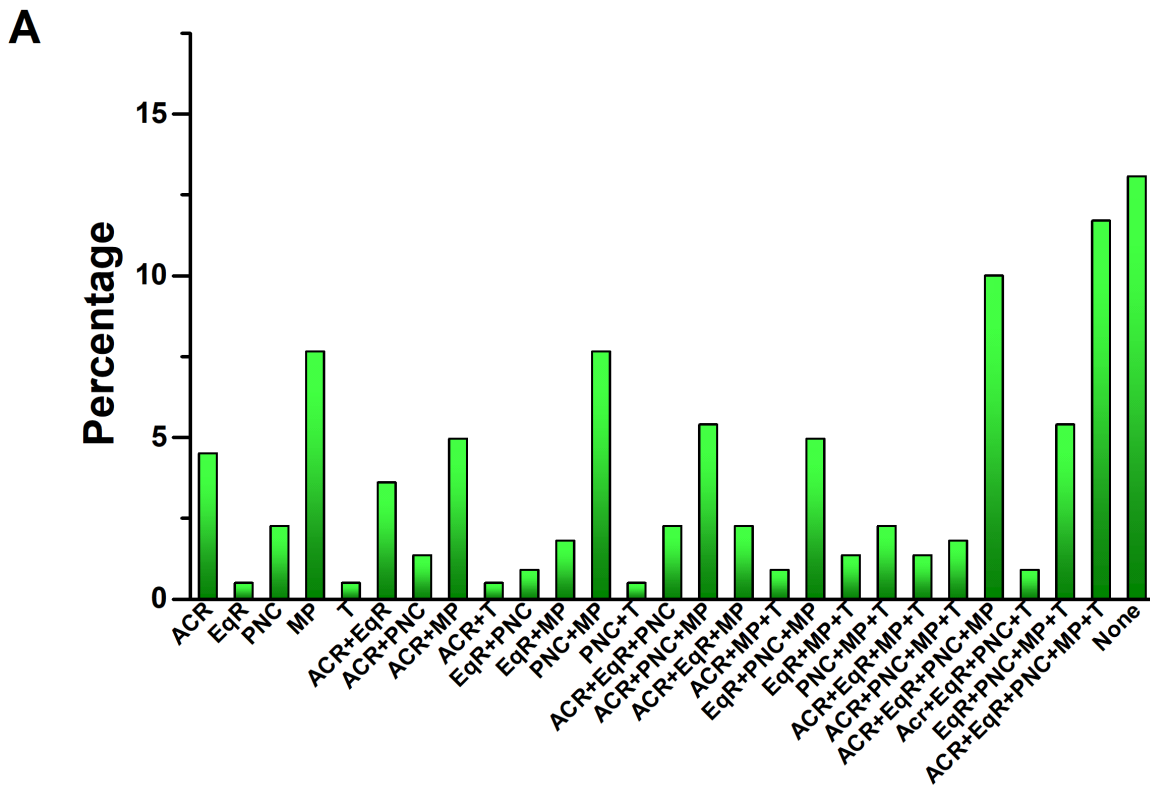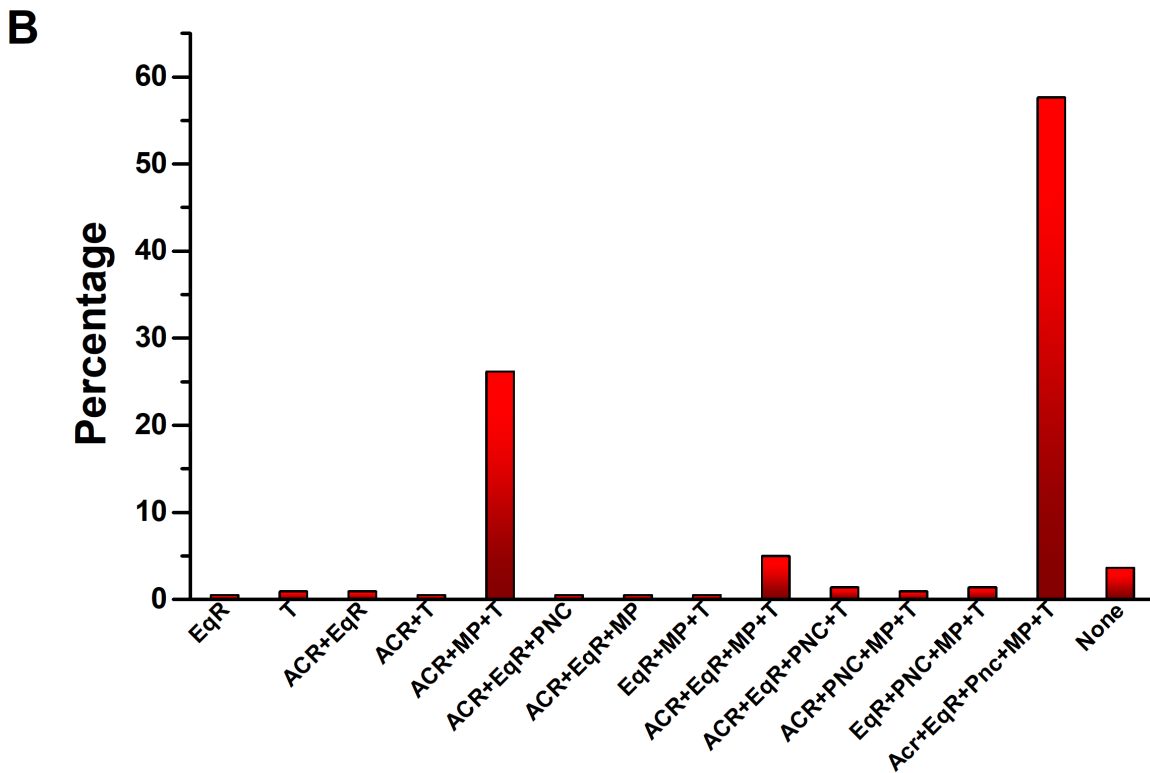

**Figure S1.** Distribution of rhodopsin and melanopsin in human sperm cells. The cells are those shown in Figure 2. The figure was drawn from the data of individual cells shown in Table S1. N is the number of cells analyzed. Abbreviations: Acr, acrosome; EqR, equatorial ring; PNC, postnuclear cap; MP, midpiece; T, tail. See Table S1 and Methods for more details.

| Cell | Rhodopsin |      |      |      |     | Melanopsin |      |      |      |     |
|------|-----------|------|------|------|-----|------------|------|------|------|-----|
|      | Acr       | EqR  | PNC  | MP   | T   | Acr        | EqR  | PNC  | MP   | T   |
| 1    | 123       | 349  | 1630 | 1018 | 196 | 582        | 1684 | 2018 | 1745 | 243 |
| 2    | 164       | 452  | 1294 | 1310 | 143 | 581        | 2434 | 2647 | 1663 | 229 |
| 3    | 181       | 243  | 226  | 250  | 44  | 185        | 279  | 479  | 293  | 78  |
| 4    | 151       | 180  | 343  | 215  | 51  | 170        | 413  | 429  | 424  | 87  |
| 5    | 415       | 215  | 284  | 400  | 63  | 169        | 300  | 459  | 466  | 131 |
| 6    | 263       | 787  | 508  | 624  | 69  | 197        | 357  | 314  | 328  | 116 |
| 7    | 699       | 300  | 171  | 312  | 60  | 182        | 373  | 285  | 295  | 143 |
| 8    | 186       | 356  | 333  | 250  | 111 | 613        | 1983 | 1816 | 214  | 110 |
| 9    | 286       | 361  | 335  | 174  | 32  | 1079       | 1168 | 723  | 435  | 156 |
| 10   | 126       | 154  | 138  | 324  | 84  | 430        | 785  | 750  | 447  | 151 |
| 11   | 175       | 90   | 131  | 317  | 48  | 151        | 308  | 423  | 200  | 95  |
| 12   | 488       | 417  | 426  | 644  | 182 | 529        | 1271 | 1798 | 1302 | 327 |
| 13   | 762       | 661  | 3202 | 1629 | 189 | 967        | 1948 | 2951 | 1745 | 278 |
| 14   | 498       | 385  | 208  | 202  | 53  | 176        | 374  | 339  | 301  | 94  |
| 15   | 314       | 392  | 122  | 240  | 55  | 212        | 353  | 302  | 329  | 100 |
| 16   | 105       | 594  | 2954 | 1302 | 155 | 349        | 1913 | 2957 | 1735 | 282 |
| 17   | 940       | 882  | 457  | 758  | 102 | 340        | 434  | 314  | 296  | 72  |
| 18   | 1093      | 591  | 601  | 1126 | 63  | 505        | 446  | 427  | 468  | 83  |
| 19   | 222       | 374  | 276  | 917  | 167 | 201        | 381  | 319  | 258  | 121 |
| 20   | 160       | 296  | 229  | 206  | 112 | 401        | 1591 | 1156 | 184  | 105 |
| 21   | 239       | 308  | 379  | 200  | 50  | 206        | 246  | 330  | 236  | 69  |
| 22   | 78        | 233  | 174  | 214  | 57  | 454        | 1491 | 930  | 368  | 139 |
| 23   | 296       | 232  | 314  | 185  | 78  | 220        | 244  | 320  | 290  | 76  |
| 24   | 378       | 675  | 811  | 343  | 124 | 158        | 227  | 433  | 268  | 63  |
| 25   | 275       | 321  | 195  | 178  | 53  | 477        | 717  | 559  | 180  | 94  |
| 26   | 446       | 239  | 121  | 243  | 113 | 297        | 188  | 154  | 190  | 68  |
| 27   | 423       | 344  | 205  | 218  | 84  | 280        | 425  | 388  | 267  | 112 |
| 28   | 443       | 215  | 223  | 256  | 72  | 138        | 310  | 457  | 689  | 167 |
| 29   | 248       | 310  | 830  | 879  | 142 | 600        | 1554 | 2008 | 1418 | 208 |
| 30   | 379       | 213  | 166  | 255  | 70  | 203        | 209  | 207  | 229  | 57  |
| 31   | 86        | 141  | 120  | 236  | 44  | 191        | 304  | 369  | 499  | 86  |
| 32   | 199       | 210  | 116  | 256  | 55  | 238        | 356  | 403  | 472  | 84  |
| 33   | 124       | 224  | 171  | 334  | 39  | 139        | 310  | 426  | 372  | 82  |
| 34   | 216       | 246  | 395  | 356  | 66  | 388        | 1264 | 1319 | 667  | 146 |
| 35   | 59        | 76   | 83   | 136  | 40  | 200        | 419  | 432  | 138  | 82  |
| 36   | 330       | 315  | 391  | 628  | 251 | 306        | 302  | 300  | 314  | 122 |
| 37   | 732       | 3438 | 1188 | 192  | 59  | 238        | 720  | 394  | 163  | 97  |
| 38   | 235       | 255  | 264  | 403  | 63  | 176        | 550  | 504  | 535  | 111 |
| 39   | 402       | 243  | 130  | 359  | 106 | 550        | 1083 | 964  | 416  | 202 |
| 40   | 165       | 500  | 454  | 379  | 98  | 708        | 1294 | 1400 | 546  | 188 |
| 41   | 205       | 225  | 573  | 390  | 81  | 651        | 1299 | 1030 | 506  | 169 |

| Cell | Rhodopsin |      |      |      |     | Melanopsin |      |      |      |     |
|------|-----------|------|------|------|-----|------------|------|------|------|-----|
|      | Acr       | EqR  | PNC  | MP   | T   | Acr        | EqR  | PNC  | MP   | T   |
| 42   | 331       | 222  | 193  | 300  | 69  | 376        | 1207 | 1323 | 570  | 159 |
| 43   | 635       | 620  | 1017 | 1214 | 150 | 571        | 1666 | 1795 | 1737 | 254 |
| 44   | 199       | 278  | 261  | 352  | 97  | 220        | 445  | 469  | 423  | 140 |
| 45   | 174       | 415  | 250  | 430  | 65  | 150        | 449  | 572  | 434  | 102 |
| 46   | 417       | 346  | 484  | 572  | 63  | 236        | 622  | 753  | 1068 | 101 |
| 47   | 191       | 780  | 344  | 215  | 53  | 637        | 1421 | 1185 | 367  | 151 |
| 48   | 249       | 252  | 185  | 386  | 66  | 181        | 443  | 452  | 344  | 101 |
| 49   | 89        | 274  | 167  | 278  | 38  | 196        | 394  | 414  | 233  | 76  |
| 50   | 335       | 338  | 241  | 413  | 72  | 431        | 1238 | 1550 | 682  | 200 |
| 51   | 197       | 301  | 276  | 250  | 112 | 538        | 2011 | 1547 | 207  | 103 |
| 52   | 472       | 246  | 152  | 239  | 50  | 154        | 381  | 337  | 261  | 114 |
| 53   | 166       | 227  | 307  | 260  | 71  | 437        | 1019 | 953  | 436  | 170 |
| 54   | 89        | 142  | 129  | 233  | 36  | 189        | 499  | 419  | 168  | 77  |
| 55   | 406       | 269  | 182  | 296  | 63  | 518        | 1161 | 1023 | 543  | 164 |
| 56   | 116       | 97   | 246  | 260  | 33  | 134        | 268  | 491  | 279  | 54  |
| 57   | 118       | 810  | 615  | 899  | 79  | 105        | 242  | 364  | 624  | 66  |
| 58   | 937       | 405  | 199  | 267  | 70  | 329        | 245  | 175  | 197  | 63  |
| 59   | 337       | 530  | 1385 | 566  | 194 | 471        | 580  | 752  | 930  | 387 |
| 60   | 204       | 438  | 132  | 397  | 131 | 140        | 990  | 359  | 764  | 92  |
| 61   | 632       | 334  | 245  | 387  | 114 | 619        | 543  | 476  | 519  | 276 |
| 62   | 685       | 1084 | 1230 | 113  | 13  | 284        | 296  | 296  | 25   | 6   |
| 63   | 1392      | 2122 | 2102 | 1679 | 768 | 438        | 1765 | 2097 | 1898 | 413 |
| 64   | 872       | 744  | 473  | 790  | 153 | 220        | 846  | 993  | 783  | 114 |
| 65   | 677       | 801  | 3116 | 782  | 165 | 514        | 532  | 1775 | 932  | 137 |
| 66   | 124       | 538  | 559  | 456  | 243 | 73         | 415  | 627  | 480  | 91  |
| 67   | 474       | 552  | 470  | 1085 | 187 | 506        | 603  | 1234 | 1323 | 444 |
| 68   | 146       | 343  | 335  | 300  | 60  | 167        | 745  | 377  | 291  | 67  |
| 69   | 73        | 137  | 207  | 261  | 73  | 70         | 397  | 511  | 528  | 67  |
| 70   | 249       | 304  | 118  | 240  | 59  | 137        | 354  | 283  | 259  | 91  |
| 71   | 229       | 941  | 590  | 850  | 167 | 115        | 975  | 994  | 1686 | 161 |
| 72   | 442       | 1113 | 2978 | 1073 | 244 | 157        | 396  | 790  | 475  | 201 |
| 73   | 239       | 376  | 148  | 173  | 47  | 69         | 198  | 128  | 135  | 38  |
| 74   | 68        | 248  | 369  | 177  | 44  | 79         | 498  | 272  | 370  | 62  |
| 75   | 168       | 177  | 159  | 211  | 76  | 320        | 252  | 227  | 220  | 115 |
| 76   | 397       | 570  | 318  | 528  | 172 | 299        | 764  | 1543 | 990  | 120 |
| 77   | 325       | 199  | 456  | 703  | 140 | 645        | 458  | 871  | 660  | 306 |
| 78   | 353       | 74   | 97   | 242  | 92  | 256        | 169  | 302  | 364  | 234 |
| 79   | 474       | 2843 | 1049 | 1918 | 86  | 220        | 738  | 409  | 470  | 68  |
| 80   | 164       | 727  | 1630 | 188  | 74  | 148        | 946  | 447  | 248  | 97  |
| 81   | 607       | 319  | 629  | 810  | 232 | 412        | 559  | 1460 | 830  | 319 |
| 82   | 170       | 171  | 454  | 548  | 148 | 368        | 522  | 782  | 629  | 266 |

| Cell | Rhodopsin |      |      |      |     | Melanopsin |      |      |      |     |
|------|-----------|------|------|------|-----|------------|------|------|------|-----|
|      | Acr       | EqR  | PNC  | MP   | T   | Acr        | EqR  | PNC  | MP   | T   |
| 83   | 146       | 300  | 472  | 1021 | 72  | 133        | 526  | 793  | 1551 | 109 |
| 84   | 107       | 143  | 119  | 129  | 69  | 387        | 393  | 411  | 283  | 151 |
| 85   | 163       | 144  | 152  | 364  | 97  | 480        | 367  | 404  | 344  | 224 |
| 86   | 558       | 1468 | 870  | 884  | 368 | 222        | 934  | 787  | 369  | 197 |
| 87   | 280       | 286  | 450  | 727  | 112 | 330        | 690  | 1121 | 1781 | 132 |
| 88   | 399       | 885  | 720  | 1221 | 392 | 199        | 623  | 988  | 1340 | 241 |
| 89   | 246       | 167  | 160  | 235  | 94  | 289        | 272  | 378  | 388  | 207 |
| 90   | 215       | 188  | 133  | 352  | 68  | 307        | 464  | 451  | 337  | 152 |
| 91   | 1616      | 1282 | 1681 | 1125 | 104 | 709        | 1609 | 1848 | 1656 | 93  |
| 92   | 361       | 1228 | 730  | 1167 | 363 | 175        | 978  | 910  | 1250 | 209 |
| 93   | 578       | 1016 | 952  | 1145 | 759 | 264        | 1465 | 1169 | 1463 | 291 |
| 94   | 408       | 731  | 378  | 309  | 79  | 211        | 831  | 830  | 847  | 103 |
| 95   | 2808      | 2806 | 2210 | 720  | 105 | 821        | 1203 | 746  | 245  | 66  |
| 96   | 1117      | 404  | 75   | 109  | 64  | 294        | 385  | 248  | 132  | 43  |
| 97   | 836       | 567  | 735  | 740  | 148 | 380        | 524  | 1046 | 930  | 121 |
| 98   | 667       | 493  | 377  | 577  | 61  | 441        | 767  | 1139 | 1283 | 100 |
| 99   | 634       | 459  | 247  | 275  | 100 | 163        | 540  | 269  | 525  | 82  |
| 100  | 2503      | 1384 | 985  | 1584 | 216 | 527        | 798  | 566  | 1808 | 266 |
| 101  | 79        | 214  | 150  | 347  | 65  | 129        | 521  | 686  | 936  | 120 |
| 102  | 608       | 354  | 551  | 424  | 118 | 289        | 460  | 736  | 581  | 69  |
| 103  | 95        | 223  | 582  | 118  | 47  | 194        | 331  | 246  | 105  | 48  |
| 104  | 363       | 548  | 201  | 409  | 78  | 362        | 981  | 1070 | 1053 | 181 |
| 105  | 1328      | 599  | 1038 | 2045 | 64  | 413        | 843  | 803  | 1276 | 91  |
| 106  | 401       | 679  | 810  | 465  | 43  | 340        | 901  | 965  | 1085 | 104 |
| 107  | 602       | 858  | 277  | 539  | 59  | 325        | 498  | 545  | 719  | 59  |
| 108  | 152       | 352  | 376  | 248  | 47  | 140        | 441  | 210  | 266  | 41  |
| 109  | 575       | 341  | 674  | 273  | 46  | 298        | 526  | 1000 | 873  | 78  |
| 110  | 578       | 362  | 387  | 341  | 62  | 207        | 904  | 702  | 480  | 111 |
| 111  | 416       | 582  | 571  | 527  | 92  | 171        | 404  | 391  | 507  | 145 |
| 112  | 139       | 225  | 350  | 258  | 130 | 385        | 868  | 998  | 235  | 181 |
| 113  | 278       | 370  | 1221 | 732  | 100 | 220        | 412  | 1837 | 1205 | 232 |
| 114  | 223       | 300  | 455  | 498  | 145 | 485        | 902  | 821  | 538  | 356 |
| 115  | 455       | 250  | 560  | 434  | 70  | 281        | 564  | 579  | 461  | 125 |
| 116  | 233       | 312  | 401  | 317  | 79  | 180        | 657  | 651  | 519  | 128 |
| 117  | 34        | 82   | 41   | 115  | 25  | 32         | 42   | 39   | 40   | 44  |
| 118  | 200       | 337  | 789  | 930  | 190 | 549        | 1820 | 1797 | 1134 | 206 |
| 119  | 267       | 383  | 358  | 230  | 70  | 209        | 565  | 772  | 399  | 97  |
| 120  | 277       | 261  | 424  | 438  | 86  | 171        | 457  | 620  | 451  | 139 |
| 121  | 217       | 338  | 752  | 545  | 90  | 197        | 504  | 476  | 346  | 116 |
| 122  | 197       | 392  | 470  | 1131 | 141 | 571        | 1771 | 1228 | 1486 | 193 |
| 123  | 255       | 433  | 1257 | 1607 | 172 | 504        | 1542 | 3129 | 2105 | 234 |

| Cell | Rhodopsin |     |      |      |     | Melanopsin |      |      |      |     |
|------|-----------|-----|------|------|-----|------------|------|------|------|-----|
|      | Acr       | EqR | PNC  | MP   | T   | Acr        | EqR  | PNC  | MP   | T   |
| 124  | 321       | 272 | 329  | 408  | 87  | 193        | 568  | 596  | 606  | 191 |
| 125  | 194       | 400 | 1457 | 1477 | 255 | 548        | 1487 | 1749 | 1244 | 256 |
| 126  | 99        | 286 | 325  | 299  | 60  | 142        | 392  | 573  | 486  | 101 |
| 127  | 149       | 147 | 155  | 279  | 50  | 116        | 244  | 469  | 354  | 114 |
| 128  | 230       | 356 | 384  | 334  | 30  | 309        | 426  | 454  | 431  | 82  |
| 129  | 187       | 216 | 150  | 330  | 41  | 215        | 547  | 408  | 289  | 88  |
| 130  | 340       | 331 | 554  | 387  | 76  | 164        | 448  | 579  | 450  | 121 |
| 131  | 179       | 220 | 556  | 1496 | 159 | 432        | 1813 | 1734 | 1570 | 216 |
| 132  | 475       | 302 | 504  | 493  | 68  | 230        | 530  | 604  | 521  | 125 |
| 133  | 255       | 416 | 323  | 307  | 77  | 197        | 829  | 667  | 501  | 130 |
| 134  | 117       | 151 | 298  | 657  | 59  | 80         | 111  | 171  | 154  | 55  |
| 135  | 166       | 292 | 351  | 626  | 162 | 329        | 742  | 1126 | 493  | 325 |
| 136  | 138       | 255 | 259  | 341  | 127 | 312        | 799  | 1171 | 455  | 313 |
| 137  | 260       | 183 | 318  | 668  | 118 | 265        | 743  | 769  | 310  | 255 |
| 138  | 145       | 317 | 541  | 350  | 76  | 155        | 590  | 648  | 473  | 121 |
| 139  | 341       | 178 | 249  | 539  | 79  | 368        | 230  | 229  | 248  | 88  |
| 140  | 103       | 133 | 120  | 77   | 33  | 51         | 93   | 82   | 66   | 46  |
| 141  | 149       | 446 | 477  | 574  | 86  | 145        | 585  | 1020 | 1090 | 120 |
| 142  | 179       | 253 | 281  | 617  | 126 | 165        | 543  | 504  | 542  | 147 |
| 143  | 295       | 271 | 383  | 715  | 94  | 134        | 703  | 709  | 713  | 139 |
| 144  | 260       | 460 | 521  | 480  | 133 | 266        | 949  | 1402 | 1045 | 193 |
| 145  | 171       | 187 | 168  | 734  | 134 | 104        | 127  | 118  | 278  | 73  |
| 146  | 415       | 290 | 332  | 241  | 78  | 138        | 296  | 860  | 570  | 114 |
| 147  | 324       | 292 | 979  | 381  | 55  | 197        | 1135 | 875  | 1017 | 95  |
| 148  | 40        | 183 | 30   | 61   | 28  | 30         | 49   | 44   | 33   | 26  |
| 149  | 78        | 236 | 753  | 312  | 33  | 66         | 362  | 203  | 124  | 20  |
| 150  | 198       | 246 | 498  | 380  | 112 | 311        | 835  | 905  | 283  | 161 |
| 151  | 388       | 270 | 517  | 635  | 74  | 125        | 409  | 504  | 505  | 128 |
| 152  | 431       | 783 | 228  | 289  | 116 | 212        | 1130 | 453  | 629  | 119 |
| 153  | 235       | 293 | 436  | 427  | 93  | 148        | 483  | 513  | 471  | 199 |
| 154  | 136       | 165 | 234  | 616  | 92  | 150        | 169  | 198  | 278  | 95  |
| 155  | 78        | 343 | 448  | 507  | 91  | 129        | 723  | 1123 | 1035 | 141 |
| 156  | 143       | 230 | 196  | 213  | 65  | 144        | 350  | 291  | 210  | 85  |
| 157  | 605       | 520 | 277  | 360  | 56  | 241        | 588  | 521  | 400  | 86  |
| 158  | 250       | 266 | 399  | 787  | 70  | 164        | 458  | 592  | 794  | 117 |
| 159  | 54        | 125 | 122  | 311  | 89  | 43         | 64   | 67   | 66   | 66  |
| 160  | 121       | 379 | 824  | 493  | 73  | 160        | 535  | 1002 | 985  | 104 |
| 161  | 64        | 82  | 40   | 39   | 34  | 27         | 36   | 23   | 24   | 26  |
| 162  | 136       | 113 | 155  | 132  | 158 | 79         | 80   | 90   | 67   | 48  |
| 163  | 153       | 358 | 369  | 665  | 61  | 174        | 447  | 744  | 390  | 106 |
| 164  | 316       | 484 | 659  | 387  | 118 | 187        | 678  | 1237 | 569  | 143 |

| Cell | Rhodopsin |      |      |      |     | Melanopsin |      |      |      |     |
|------|-----------|------|------|------|-----|------------|------|------|------|-----|
|      | Acr       | EqR  | PNC  | MP   | T   | Acr        | EqR  | PNC  | MP   | T   |
| 165  | 298       | 226  | 247  | 286  | 188 | 303        | 376  | 304  | 200  | 101 |
| 166  | 351       | 255  | 503  | 890  | 108 | 265        | 276  | 330  | 337  | 91  |
| 167  | 113       | 145  | 128  | 813  | 73  | 94         | 87   | 84   | 201  | 59  |
| 168  | 634       | 285  | 283  | 442  | 106 | 144        | 146  | 134  | 191  | 70  |
| 169  | 173       | 223  | 740  | 464  | 125 | 512        | 1346 | 1621 | 1030 | 231 |
| 170  | 232       | 296  | 160  | 728  | 37  | 134        | 400  | 509  | 682  | 76  |
| 171  | 255       | 266  | 249  | 401  | 49  | 213        | 314  | 798  | 689  | 116 |
| 172  | 55        | 117  | 35   | 63   | 32  | 61         | 69   | 44   | 40   | 36  |
| 173  | 180       | 203  | 560  | 579  | 83  | 190        | 440  | 859  | 993  | 117 |
| 174  | 201       | 194  | 183  | 346  | 94  | 225        | 331  | 392  | 528  | 140 |
| 175  | 168       | 395  | 244  | 358  | 159 | 331        | 873  | 790  | 418  | 218 |
| 176  | 99        | 390  | 366  | 544  | 121 | 149        | 850  | 801  | 1385 | 175 |
| 177  | 848       | 428  | 409  | 1265 | 240 | 363        | 1006 | 1234 | 627  | 357 |
| 178  | 157       | 350  | 477  | 375  | 89  | 224        | 1112 | 1668 | 652  | 142 |
| 179  | 428       | 190  | 235  | 678  | 111 | 258        | 231  | 238  | 307  | 110 |
| 180  | 210       | 629  | 699  | 624  | 126 | 200        | 1077 | 1450 | 1199 | 192 |
| 181  | 101       | 319  | 565  | 427  | 60  | 146        | 679  | 760  | 786  | 102 |
| 182  | 453       | 314  | 575  | 358  | 135 | 217        | 583  | 1483 | 730  | 230 |
| 183  | 224       | 212  | 352  | 452  | 55  | 161        | 312  | 499  | 615  | 118 |
| 184  | 162       | 226  | 541  | 394  | 66  | 234        | 324  | 531  | 578  | 139 |
| 185  | 190       | 483  | 635  | 1334 | 178 | 620        | 1877 | 1856 | 1477 | 274 |
| 186  | 80        | 397  | 244  | 485  | 40  | 83         | 747  | 620  | 738  | 87  |
| 187  | 197       | 182  | 171  | 160  | 88  | 204        | 321  | 281  | 216  | 79  |
| 188  | 189       | 213  | 214  | 189  | 80  | 230        | 323  | 375  | 236  | 83  |
| 189  | 452       | 381  | 1287 | 1094 | 264 | 629        | 1685 | 1848 | 1477 | 359 |
| 190  | 270       | 444  | 550  | 416  | 87  | 469        | 1437 | 1297 | 877  | 196 |
| 191  | 12        | 9    | 7    | 8    | 13  | 11         | 11   | 11   | 9    | 11  |
| 192  | 288       | 384  | 260  | 338  | 140 | 443        | 1141 | 813  | 384  | 287 |
| 193  | 677       | 503  | 561  | 377  | 136 | 339        | 960  | 1066 | 439  | 395 |
| 194  | 359       | 213  | 201  | 628  | 51  | 140        | 262  | 581  | 644  | 102 |
| 195  | 162       | 322  | 478  | 569  | 73  | 161        | 397  | 534  | 709  | 120 |
| 196  | 280       | 189  | 496  | 623  | 94  | 148        | 399  | 1158 | 965  | 157 |
| 197  | 381       | 312  | 326  | 561  | 59  | 175        | 411  | 658  | 502  | 110 |
| 198  | 225       | 384  | 1334 | 1438 | 303 | 666        | 1566 | 1894 | 2019 | 297 |
| 199  | 391       | 395  | 601  | 535  | 94  | 243        | 1275 | 1175 | 863  | 254 |
| 200  | 140       | 157  | 136  | 243  | 78  | 147        | 183  | 162  | 186  | 83  |
| 201  | 98        | 110  | 126  | 306  | 53  | 126        | 334  | 422  | 491  | 98  |
| 202  | 131       | 118  | 505  | 360  | 61  | 210        | 475  | 827  | 531  | 106 |
| 203  | 79        | 1148 | 218  | 319  | 74  | 146        | 486  | 441  | 427  | 89  |
| 204  | 333       | 483  | 290  | 229  | 60  | 319        | 570  | 699  | 280  | 94  |
| 205  | 142       | 187  | 99   | 262  | 58  | 123        | 417  | 491  | 329  | 94  |

| Cell | Rhodopsin |      |      |      |     | Melanopsin |     |     |      |     |
|------|-----------|------|------|------|-----|------------|-----|-----|------|-----|
|      | Acr       | EqR  | PNC  | MP   | T   | Acr        | EqR | PNC | MP   | T   |
| 206  | 112       | 129  | 528  | 534  | 52  | 140        | 396 | 902 | 749  | 77  |
| 207  | 55        | 166  | 359  | 440  | 82  | 97         | 350 | 451 | 603  | 98  |
| 208  | 155       | 225  | 371  | 471  | 80  | 168        | 429 | 832 | 696  | 98  |
| 209  | 175       | 208  | 190  | 227  | 92  | 163        | 407 | 466 | 498  | 182 |
| 210  | 257       | 294  | 450  | 539  | 53  | 161        | 516 | 807 | 1250 | 90  |
| 211  | 2246      | 2333 | 1450 | 651  | 180 | 520        | 650 | 702 | 382  | 73  |
| 212  | 580       | 684  | 1197 | 614  | 246 | 328        | 330 | 402 | 183  | 109 |
| 213  | 353       | 757  | 887  | 368  | 131 | 144        | 256 | 474 | 283  | 62  |
| 214  | 1824      | 1085 | 379  | 1005 | 291 | 485        | 360 | 242 | 502  | 95  |
| 215  | 970       | 894  | 497  | 764  | 124 | 342        | 436 | 334 | 309  | 80  |
| 216  | 1074      | 598  | 611  | 1058 | 82  | 485        | 433 | 446 | 466  | 92  |
| 217  | 896       | 442  | 212  | 247  | 75  | 322        | 261 | 172 | 189  | 60  |
| 218  | 467       | 591  | 463  | 288  | 233 | 218        | 290 | 259 | 264  | 111 |
| 219  | 656       | 171  | 247  | 351  | 77  | 242        | 150 | 236 | 198  | 75  |
| 220  | 394       | 206  | 156  | 242  | 80  | 205        | 208 | 212 | 232  | 56  |
| 221  | 478       | 229  | 131  | 261  | 101 | 324        | 185 | 150 | 204  | 68  |
| 222  | 119       | 808  | 672  | 960  | 69  | 102        | 243 | 372 | 661  | 61  |

**Table S1.** Intensity of rhodopsin and melanopsin staining in different regions of individual human sperm cells. Each row represents an individual sperm cell. The values shown are the relative fluorescens intensities in the acrosome (Acr), equatorial ring (EqR), postnuclear cap (PNC), midpiece (MP) and tail (T). Fluorescens intensities of rhodopsin and melanopsin higher than the threshold values (staining per unit area larger than the sum mean+SD of the negative control and larger than 150% of the mean of the negative control) are highlighted in green and red, respectively. Cells were considered as stained when the measured intensity of their staining per unit area was both larger than the sum mean+SD of the negative control (staining with secondary antibody only) and larger than 150% of the mean of the negative control. Only highlighted values were considered as true staining. The values shown are mean of 6 sperm samples from different donors.



| Animal | Treatment | VCL<br>( $\mu\text{m/s}$ ) | VSL<br>( $\mu\text{m/s}$ ) | VAP<br>( $\mu\text{m/s}$ ) | LIN             | WOB             | Motility<br>(%) |
|--------|-----------|----------------------------|----------------------------|----------------------------|-----------------|-----------------|-----------------|
| 1      | IBMX      | 219 $\pm$ 15               | 57 $\pm$ 10                | 86 $\pm$ 8                 | 0.68 $\pm$ 0.09 | 0.41 $\pm$ 0.05 | 46              |
|        | 2-APB     | 247 $\pm$ 26               | 41 $\pm$ 8                 | 70 $\pm$ 8                 | 0.57 $\pm$ 0.08 | 0.29 $\pm$ 0.02 | 39              |
|        | Control   | 233 $\pm$ 22               | 50 $\pm$ 9                 | 71 $\pm$ 5                 | 0.71 $\pm$ 0.11 | 0.32 $\pm$ 0.04 | 36              |
| 2      | IBMX      | 267 $\pm$ 20               | 56 $\pm$ 7                 | 102 $\pm$ 9                | 0.61 $\pm$ 0.05 | 0.39 $\pm$ 0.02 | 33              |
|        | 2-APB     | 230 $\pm$ 22               | 48 $\pm$ 5                 | 76 $\pm$ 6                 | 0.66 $\pm$ 0.04 | 0.36 $\pm$ 0.02 | 44              |
|        | Control   | 206 $\pm$ 14               | 47 $\pm$ 5                 | 71 $\pm$ 5                 | 0.65 $\pm$ 0.04 | 0.35 $\pm$ 0.01 | 36              |
| 3      | IBMX      | 217 $\pm$ 18               | 56 $\pm$ 7                 | 86 $\pm$ 7                 | 0.63 $\pm$ 0.05 | 0.44 $\pm$ 0.03 | 38              |
|        | 2-APB     | 271 $\pm$ 12               | 46 $\pm$ 4                 | 94 $\pm$ 4                 | 0.51 $\pm$ 0.03 | 0.36 $\pm$ 0.01 | 54              |
|        | Control   | 187 $\pm$ 14               | 52 $\pm$ 5                 | 71 $\pm$ 5                 | 0.72 $\pm$ 0.03 | 0.40 $\pm$ 0.01 | 24              |
| 4      | IBMX      | 267 $\pm$ 16               | 61 $\pm$ 4                 | 94 $\pm$ 5                 | 0.65 $\pm$ 0.03 | 0.39 $\pm$ 0.01 | 49              |
|        | 2-APB     | 250 $\pm$ 10               | 64 $\pm$ 4                 | 93 $\pm$ 4                 | 0.70 $\pm$ 0.02 | 0.38 $\pm$ 0.01 | 38              |
|        | Control   | 269 $\pm$ 13               | 60 $\pm$ 4                 | 92 $\pm$ 4                 | 0.64 $\pm$ 0.02 | 0.37 $\pm$ 0.01 | 37              |
| 5      | IBMX      | 284 $\pm$ 11               | 71 $\pm$ 4                 | 110 $\pm$ 5                | 0.65 $\pm$ 0.02 | 0.40 $\pm$ 0.01 | 42              |
|        | 2-APB     | 269 $\pm$ 9                | 59 $\pm$ 3                 | 106 $\pm$ 4                | 0.59 $\pm$ 0.02 | 0.41 $\pm$ 0.01 | 50              |
|        | Control   | 250 $\pm$ 14               | 66 $\pm$ 7                 | 107 $\pm$ 7                | 0.60 $\pm$ 0.04 | 0.45 $\pm$ 0.02 | 42              |
| 6      | IBMX      | 258 $\pm$ 19               | 65 $\pm$ 9                 | 94 $\pm$ 9                 | 0.67 $\pm$ 0.05 | 0.40 $\pm$ 0.02 | 60              |
|        | 2-APB     | 256 $\pm$ 33               | 51 $\pm$ 7                 | 100 $\pm$ 14               | 0.54 $\pm$ 0.05 | 0.42 $\pm$ 0.04 | 31              |
|        | Control   | 254 $\pm$ 20               | 64 $\pm$ 7                 | 91 $\pm$ 9                 | 0.70 $\pm$ 0.04 | 0.36 $\pm$ 0.02 | 31              |

**Table S2.** Effects of inhibitors of the transducin/cyclic nucleotide pathway and of the PLC pathway on the motility parameters of sperm cells of mice that do not express melanopsin. Sperm samples from *Opn4<sup>-/-</sup>*; *Opn4:tdTomato<sup>+</sup>* mice were subjected to IBMX (1 mM), 2APB (0.1 mM), or, as a control, the solvent DMSO, and then the motility was analyzed (37°C). Abbreviations: VSL, straight-line velocity (the time-average velocity of the sperm head along a straight line from its first position to its last position, expressed in  $\mu\text{m/s}$ ); VCL, curvilinear velocity (time-averaged velocity of a sperm head along its actual curvilinear path, expressed in  $\mu\text{m/s}$ ); VAP, average path velocity (velocity over an average path generated by a roaming average, expressed in  $\mu\text{m/s}$ ), LIN, linearity [defined as  $(\text{VSL}/\text{VCL}) \times 100$ ]; MOT (%), percentage of motile spermatozoa. The values are the mean  $\pm$  SEM of the indicated 6 mice (~300 cells analyzed for each mouse). None of the parameters in the presence of an inhibitor was significantly different from the no-inhibitor control.

| Animal                                  | VCL<br>( $\mu\text{m/s}$ ) | VSL<br>( $\mu\text{m/s}$ ) | VAP<br>( $\mu\text{m/s}$ ) | LIN             | WOB              | Motility<br>(%) |
|-----------------------------------------|----------------------------|----------------------------|----------------------------|-----------------|------------------|-----------------|
| Rho <sup>-</sup> Mel <sup>-</sup> (n=7) | 269 $\pm$ 9                | 56 $\pm$ 2                 | 92 $\pm$ 4*                | 0.63 $\pm$ 0.02 | 0.36 $\pm$ 0.02* | 46              |
| Rho <sup>+</sup> Mel <sup>+</sup> (n=8) | 266 $\pm$ 9                | 73 $\pm$ 7                 | 120 $\pm$ 3                | 0.62 $\pm$ 0.04 | 0.45 $\pm$ 0.01  | 33              |

**Table S3.** Motility parameters of sperm cells of mice that do not express both melanopsin and rhodopsin (*Opn2<sup>-/-</sup>*; *Opn4<sup>-/-</sup>*; *Opn4:tdTomato<sup>+</sup>*) and of wild-type mice. The results are expressed as mean  $\pm$  SEM. \* $P < 0.001$  according to unpaired *t* test. See Table S2 for details.

## References

1. Davis, R. O. & Siemers, R. J. Derivation and reliability of kinematic measures of sperm motion. *Reprod. Fertil. Dev.* **7**, 857–869 (1995).
